# Supplementary figures and images for: Multiple sclerosis: structural and functional integrity of the visual system following alemtuzumab therapy
Source: HighWire-hosted journal article supplement (doi:10.1136/jnnp-2021-326164), 2021-06-29

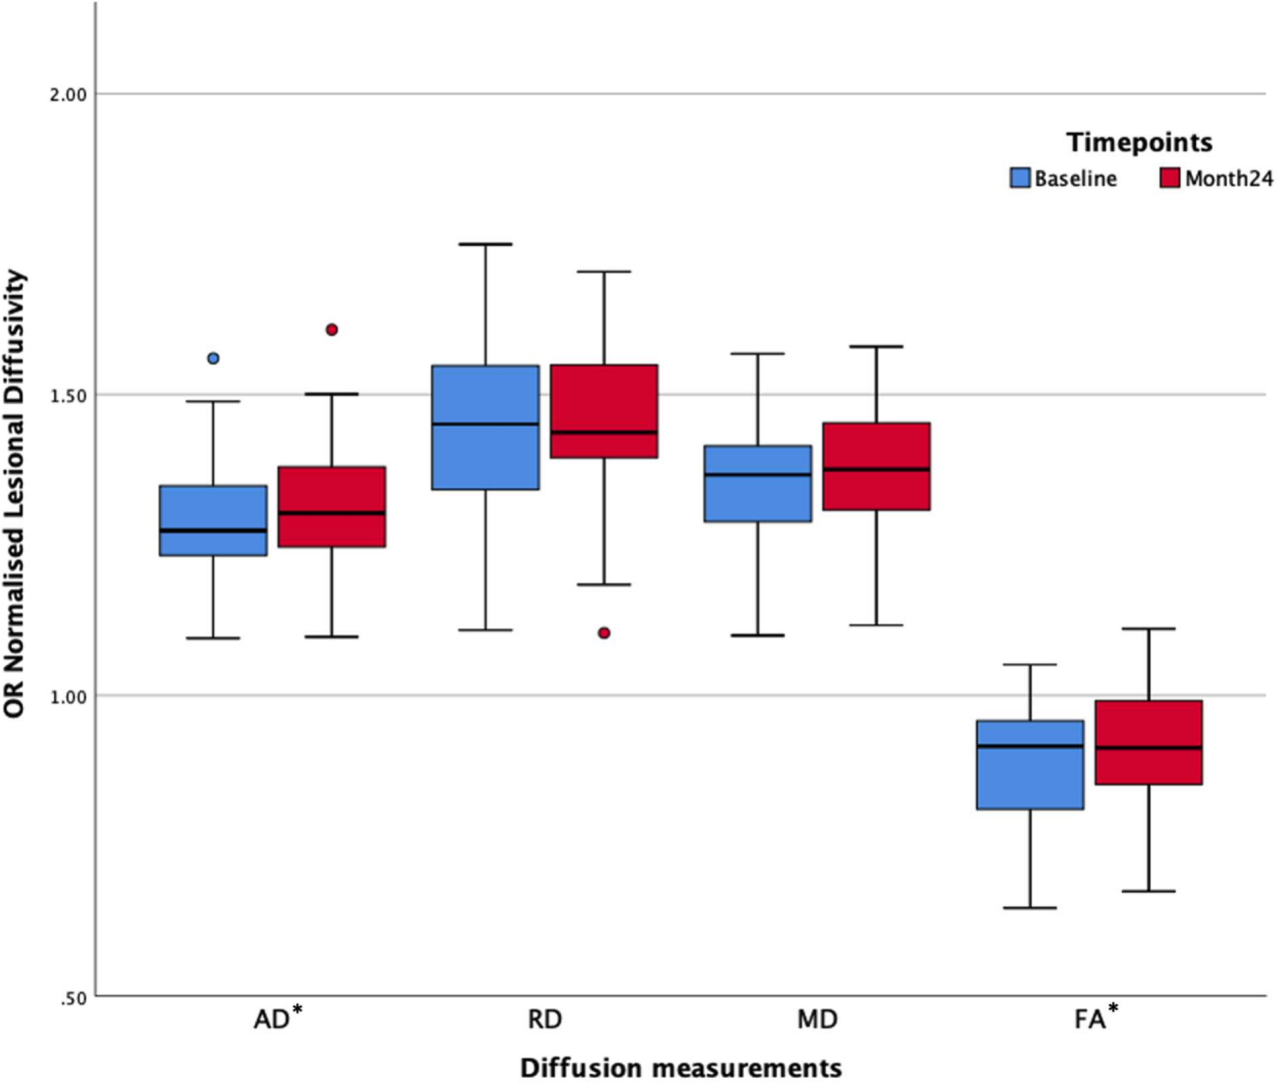

Supplement: jnnp-2021-326164supp001_data_supplement.pdf [file jnnp-2021-326164supp001_data_supplement.pdf]
